# Supplementary material for: A biomimetic nanodrug self-assembled from small molecules for enhanced ferroptosis therapy
Source: Royal Society of Chemistry journal article supplement (doi:10.1039/d1bm01746b), 2021-12-20
Supplement: d1bm01746b1.pdf [file d1bm01746b1.pdf]

## Supporting Information

### **A biomimetic nanodrug self-assembled from small molecules for enhanced ferroptosis therapy**

Xueming Xu,<sup>‡a</sup> Yuan Chen,<sup>‡b</sup> Jinyong Gui,<sup>d</sup> Peilian Liu,<sup>c\*</sup> Yong Huang,<sup>b</sup> Baihao Shao,<sup>b</sup>  
Yuan Ping,<sup>b</sup> Bowen Li,<sup>b\*</sup>

<sup>a</sup> School of Pharmacy, Shanghai Jiao Tong University, Shanghai, PR China, 200240

<sup>b</sup> College of Pharmaceutical Sciences, Zhejiang University, Hangzhou 310058, China

<sup>c</sup> School of Chemistry and Chemical Engineering, Key Laboratory of Clean Energy Materials Chemistry of Guangdong Higher Education Institutes, Lingnan Normal University, Zhanjiang, 524048, Guangdong, PR China

<sup>d</sup> Yingtan People's Hospital, Yuehu District, Yingtan, Jiangxi, 335000, PR China

\* Corresponding author: E-mail: liupeilian2010@126.com (P. L. Liu);  
bowen\_li@zju.edu.cn (B. W. Li).

‡ The authors contributed equally to this work.

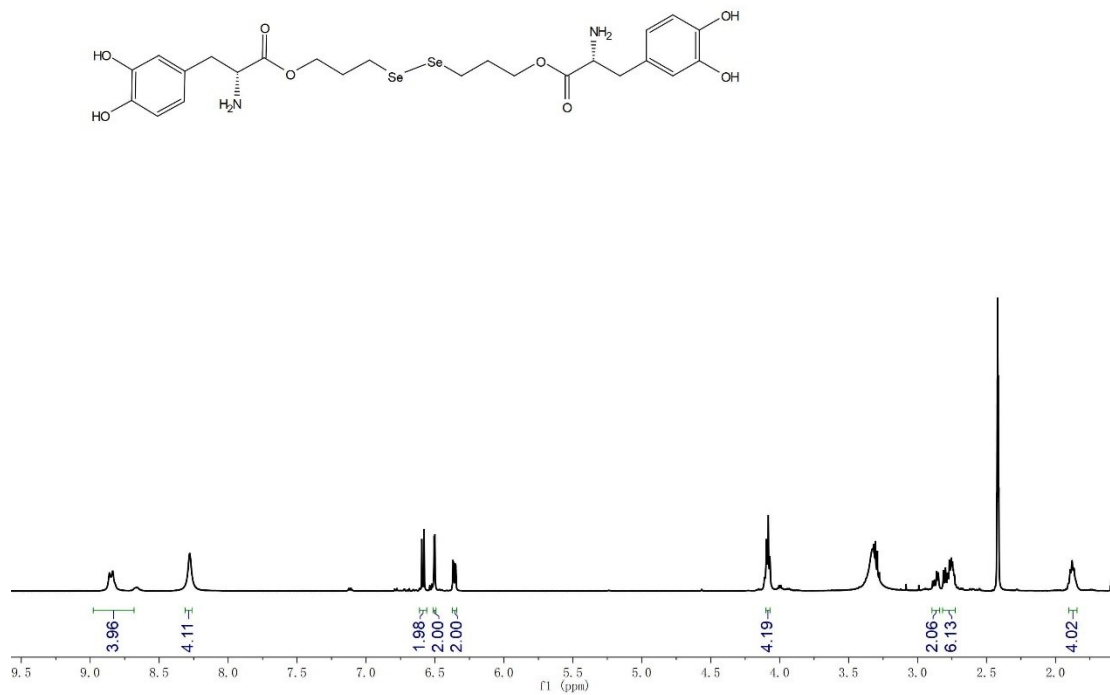

**Fig. S1** <sup>1</sup>H-NMR spectrum of compound DSe (in DMSO-d<sub>6</sub>).

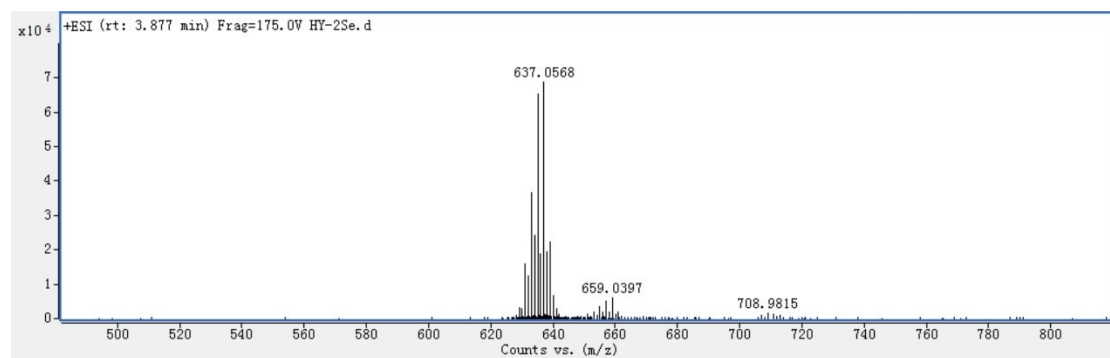

**Fig. S2** HR-MS of compound DSe.

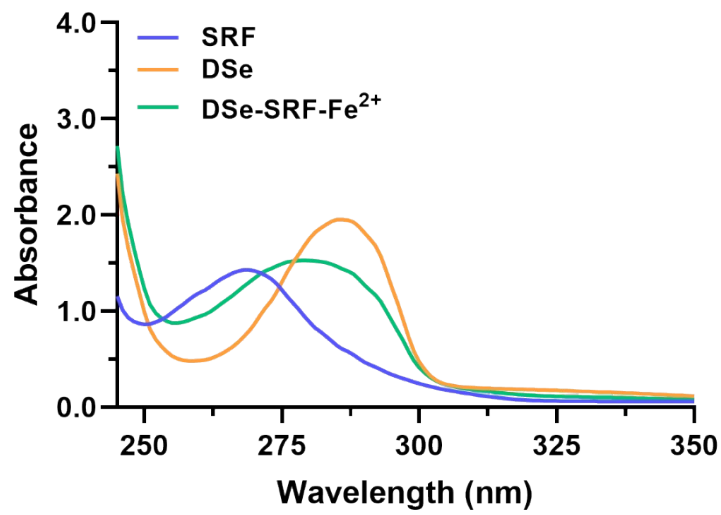

**Fig. S3** UV-vis absorption spectra of DSe, SRF and DSe-SRF-Fe<sup>2+</sup>.

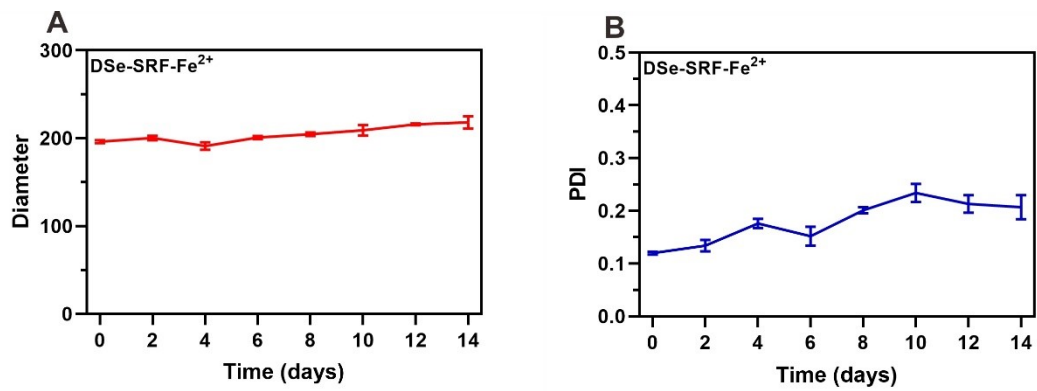

**Fig. S4.** Diameters (A) and PDI (B) for DSe-SRF-Fe<sup>2+</sup> was determined by DLS in PBS buffer (pH 7.4) for 14 days.

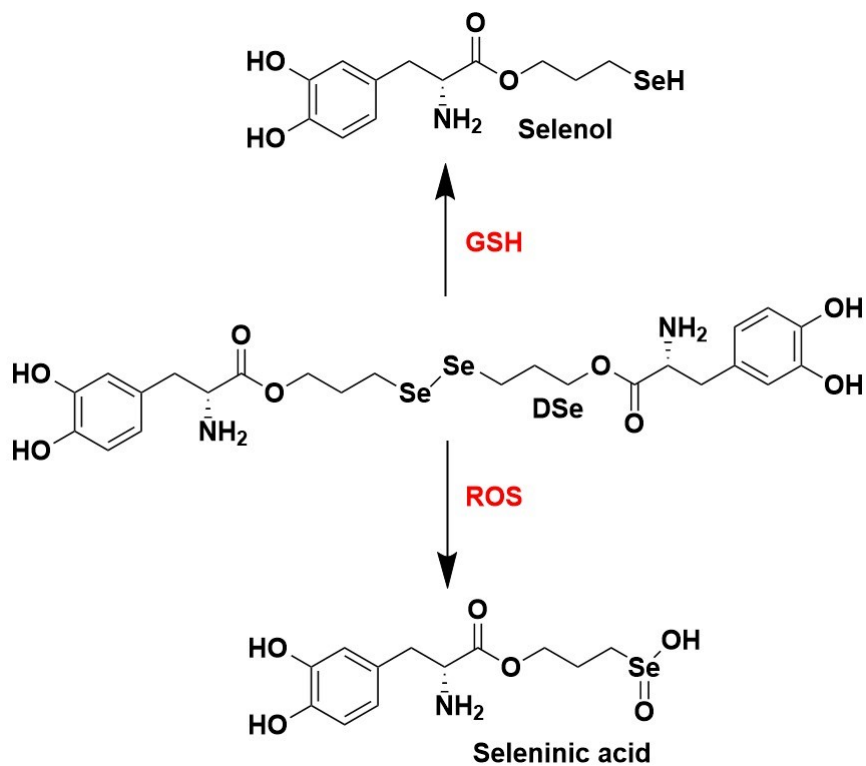

**Fig. S5** The response mechanism of DSe in high levels of GSH or ROS environments.

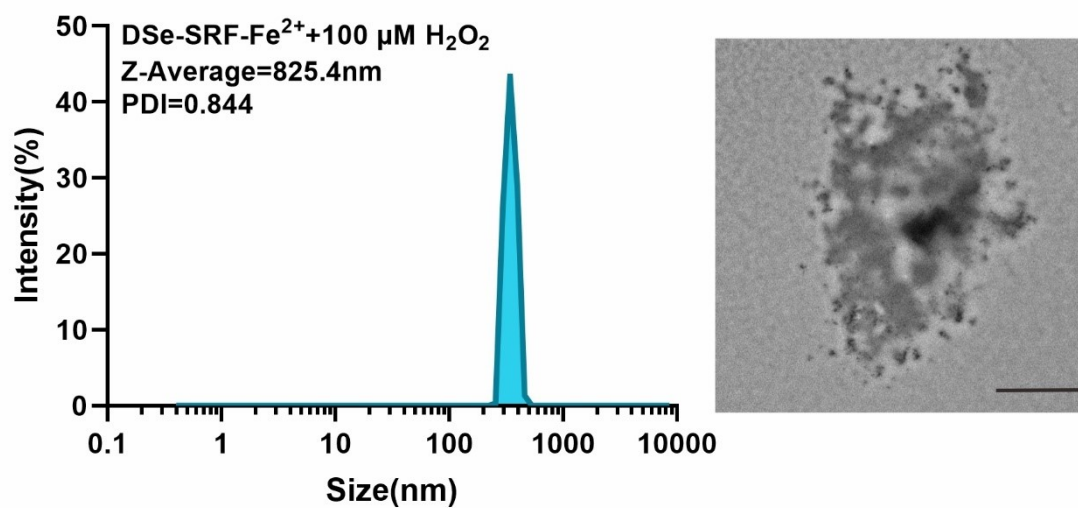

**Fig. S6** DLS and TEM image of CM-DSe-SRF-Fe<sup>2+</sup> after incubation with 100 μM H<sub>2</sub>O<sub>2</sub>, scale bar: 500 nm.

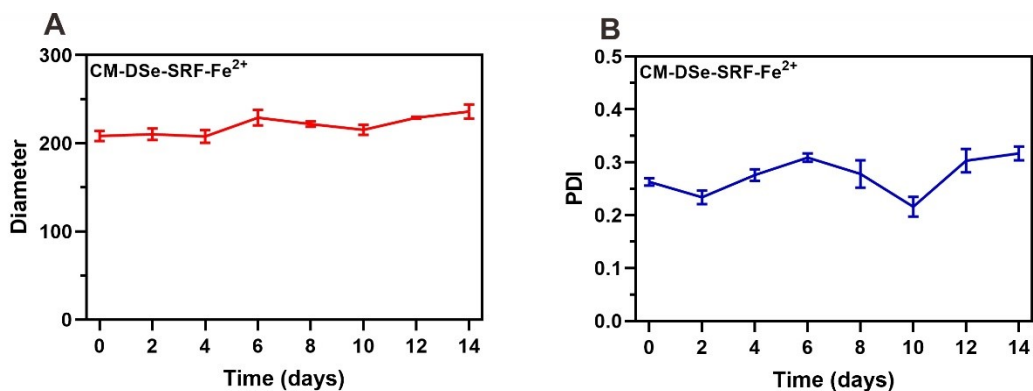

**Fig. S7** Diameters (A) and PDI (B) for CM-DSe-SRF-Fe<sup>2+</sup> was determined by DLS in PBS buffer (pH 7.4) for 14 days.

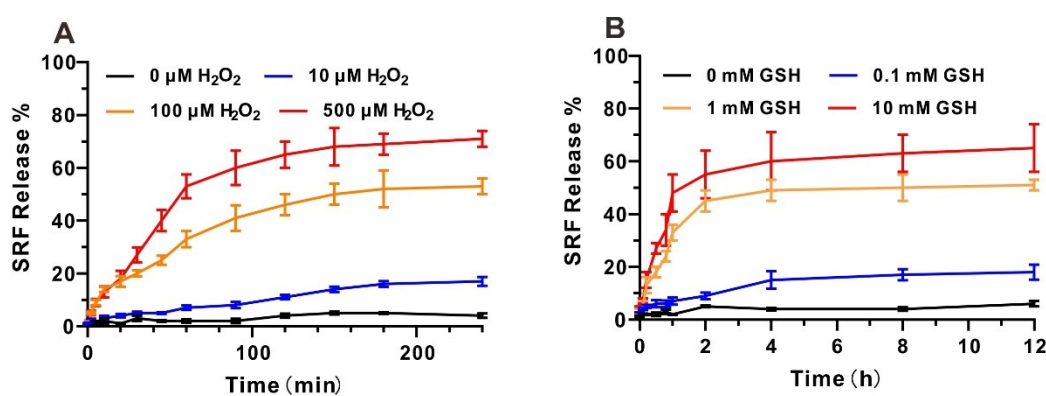

**Fig. S8** A) The SRF release behavior from CM-DSe-SRF-Fe<sup>2+</sup> in the presence of H<sub>2</sub>O<sub>2</sub> (0, 10, 100 and 500 μM) for 240 min (pH 7.4 PBS buffer at 37 °C); B) The SRF release behavior from CM-DSe-SRF-Fe<sup>2+</sup> in the presence of GSH (0, 0.1, 1 and 10 mM) for 12 h (pH 7.4 PBS buffer at 37 °C).

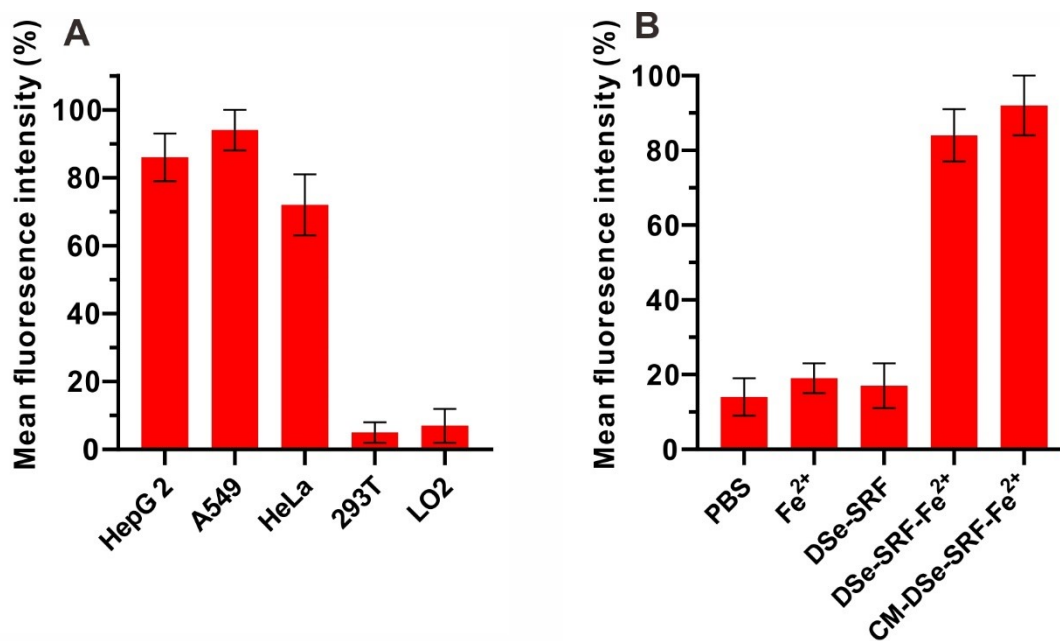

**Fig. S9** Quantitative analysis of the fluorescence intensity of A) 3A and B) 3B by image J.

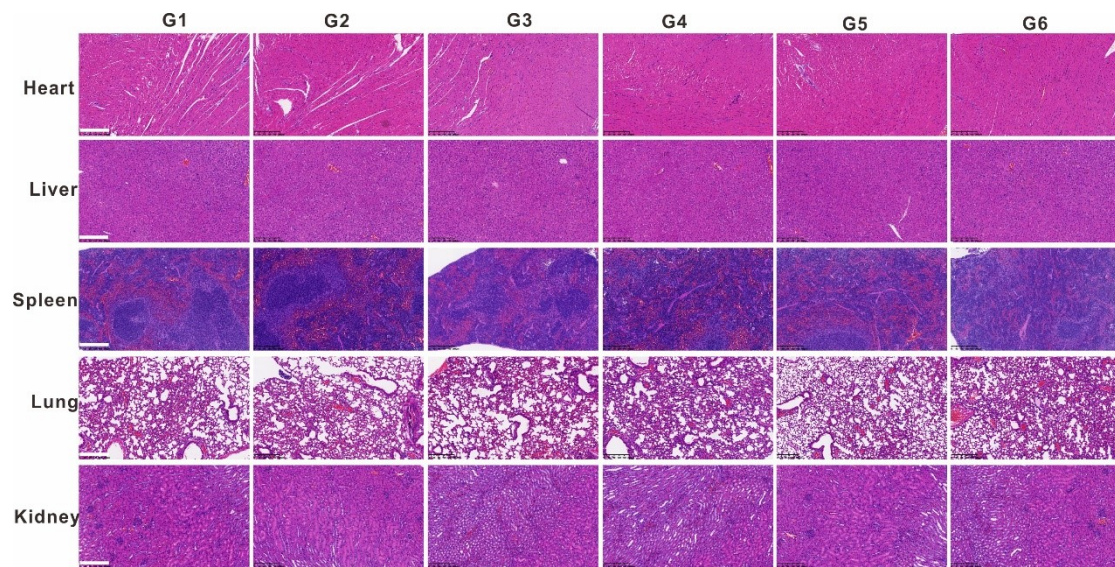

**Fig. S10** The H&E staining results of the major organs (heart, liver, spleen, lung and kidney) with different formulations (G1-G6), scale bars: 200  $\mu\text{m}$ .
